# Supplementary material
Source: PubMed Central journal article supplement (PMC9068500)
Supplement: 11655_2022_3673_MOESM1_ESM.pdf [file 11655_2022_3673_MOESM1_ESM.pdf]

1 Supplementary material to “Effectiveness and Safety of Baidu Jieduan Granules for COVID-19: A Retrospective Observational Multicenter Study” written by  
2 XU Xiang-ru, ZHANG Wen, WU Xin-xin, et al published in Chinese Journal of Integrative Medicine (DOI: <https://doi.org/10.1007/s11655-022-3673-x>)

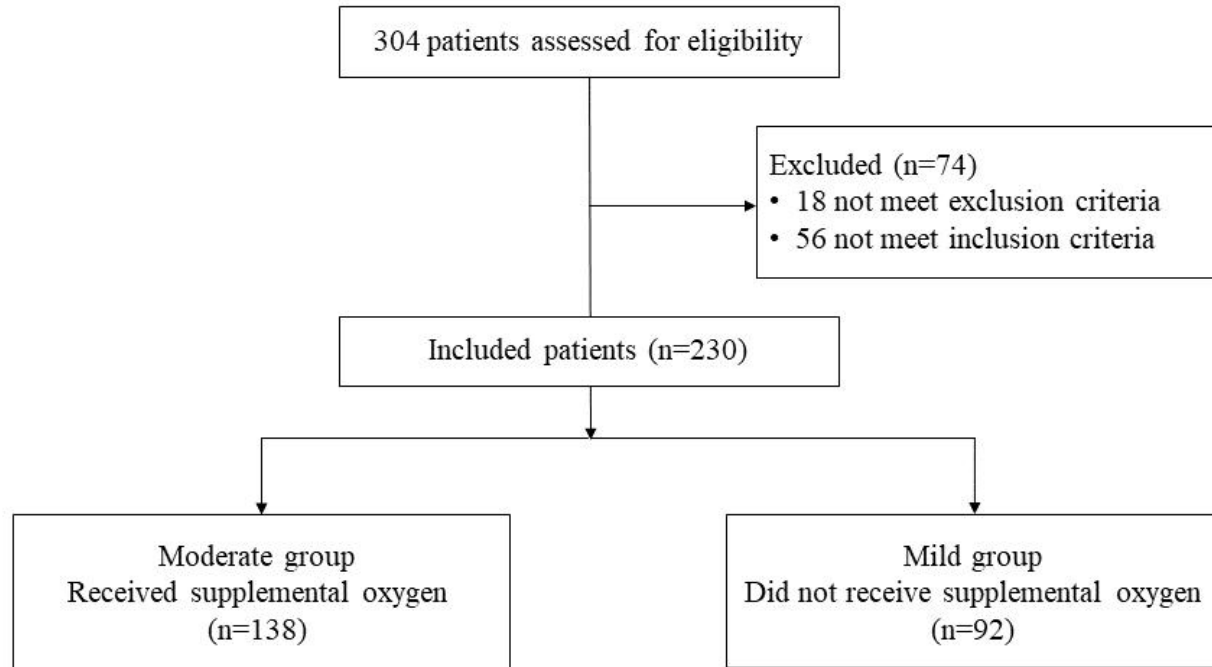

Appendix 1. Flow diagram

3

4

5

6 **Appendix 2. Primary and Secondary Clinical Outcomes in the population stratified by age**

|                                                           | Mild group (n = 92) |                 |                | Moderate group (n = 138) |                  |                |
|-----------------------------------------------------------|---------------------|-----------------|----------------|--------------------------|------------------|----------------|
|                                                           | < 60 y (n = 73)     | ≥ 60 y (n = 19) | <i>P</i> vaule | < 60 y (n = 79)          | ≥ 60 y (n = 59)  | <i>P</i> vaule |
| <b>Primary clinical outcome</b>                           |                     |                 |                |                          |                  |                |
| Day 28 disease progression rate, no. (%)                  | 0                   | 0               | -              | 5 (6.3%)                 | 5 (8.5%)         | 0.744          |
| Day 28 discharge rate, no. (%)                            | 73 (100%)           | 19 (100%)       | -              | 74 (93.7%)               | 54 (91.5%)       | 0.744          |
| <b>Secondary clinical outcome</b>                         |                     |                 |                |                          |                  |                |
| Negative conversion time of nucleic acid, median (IQR), d | 10 (3, 15)          | 3 (2, 9)        | 0.001*         | 15 (11.75, 19.25)        | 10 (4, 16)       | 0.002#         |
| Duration of hospital stay, median (IQR), d                | 13 (10, 17.5)       | 12 (10, 14)     | 0.36           | 18.5 (14, 23)            | 17.5 (14, 24.25) | 0.722          |
| Number of fever reduction cases (%)                       | 42 (100%)           | 8 (100%)        | -              | 63 (94.0%)               | 28 (87.5%)       | 0.265          |
| Fever reduction time, median (IQR), d                     | 4 (2, 5)            | 5 (3, 6)        | 0.309          | 4 (3, 6)                 | 3 (2, 6)         | 0.046          |
| Number of cough reduction cases (%)                       | 48 (92.3%)          | 12 (92.3%)      | -              | 58 (89.2%)               | 34 (89.5%)       | 0.969          |
| Cough reduction time, median (IQR), d                     | 7.5 (5, 10)         | 6 (2.25, 9)     | 0.203          | 10 (6.75, 14)            | 8 (5, 11.25)     | 0.088          |
| Number of fatigue reduction cases (%)                     | 26 (100%)           | 7 (100%)        | -              | 51 (92.7%)               | 31 (88.6%)       | 0.499          |
| Fatigue reduction time, median (IQR), d                   | 5 (3, 8)            | 6 (2, 9)        | 0.983          | 10 (6, 12)               | 9 (6, 12)        | 0.989          |

7 Abbreviations: IQR, interquartile range; \*: < 60 y vs ≥ 60 y in mild group, *P* < 0.005; #: < 60 y vs ≥ 60 y in moderate group, *P* < 0.005.

**Appendix 3. Patients' Clinical Status on days 7, 14, and 28**

|                                              | <b>Total (n = 230)</b> | <b>Mild group (n = 92)</b> | <b>Moderate group (n = 138)</b> |
|----------------------------------------------|------------------------|----------------------------|---------------------------------|
| <b>Time to clinical improvement, d</b>       | 12 (10, 17)            | 12 (10, 16)                | 12 (9, 17.25)                   |
| <b>Clinical improvement rate, No. (%)</b>    |                        |                            |                                 |
| Day 7                                        | 22 (9.6%)              | 7 (7.6%)                   | 15 (10.9%)                      |
| Day 14                                       | 155 (67.4%)            | 63 (68.5%)                 | 92 (66.7%)                      |
| Day 28                                       | 220 (95.7%)            | 92 (100%)                  | 128 (92.8%)                     |
| <b>Six-category scale at day 7, No. (%)</b>  |                        |                            |                                 |
| 1- discharge                                 | 7/230 (3%)             | 7/92 (7.6%)                | 0/138                           |
| 2- mild                                      | 100/230 (43.5%)        | 85/92 (92.4%)              | 15/138 (10.9%)                  |
| 3- moderate                                  | 109/230 (47.4%)        | 0/92                       | 109/138 (47.4%)                 |
| 4- severe                                    | 12/230 (5.2%)          | 0/92                       | 12/138 (8.7%)                   |
| 5-critical                                   | 2/230 (0.9%)           | 0/92                       | 2/138 (1.4%)                    |
| <b>Six-category scale at day 14, No. (%)</b> |                        |                            |                                 |
| 1- discharge                                 | 103/225 (45.8%)        | 63/92 (68.5%)              | 40/133 (30.1%)                  |
| 2- mild                                      | 82/225 (36.4%)         | 29/92 (31.5%)              | 53/133 (39.8%)                  |
| 3- moderate                                  | 34/225 (15.1%)         | 0/92                       | 34/133 (25.6%)                  |
| 4- severe                                    | 3/225 (1.3%)           | 0/92                       | 3/133 (2.3%)                    |
| 5- critical                                  | 1/225 (0.4%)           | 0/92                       | 1/133 (0.4%)                    |
| <b>Six-category scale at day28, No. (%)</b>  |                        |                            |                                 |
| 1- discharge                                 | 213/222 (95.9%)        | 92/92 (100%)               | 121/130 (93.1%)                 |
| 2- mild                                      | 7/222 (3.2%)           | 0/92                       | 7/130 (5.4%)                    |
| 3- moderate                                  | 1/222 (0.5%)           | 0/92                       | 1/130 (0.8%)                    |
| 5- critical                                  | 1/222 (0.5%)           | 0/92                       | 1/130 (0.8%)                    |

**Appendix 4. Infection indicators at baseline, days 3, 7, and 14**

|                                             | Baseline           | Day3               | Day7              | Day14            |
|---------------------------------------------|--------------------|--------------------|-------------------|------------------|
| <b>Hematologic</b>                          |                    |                    |                   |                  |
| <b>WBC, median (IQR), ×10<sup>9</sup>/L</b> |                    |                    |                   |                  |
| All patients                                | 4.6 (3.61,5.99)    | 4.4 (3.25,5.49)    | 5.36 (4.38,6.79)  | 5.39 (4.43,6.58) |
| Mild group                                  | 5.02 (3.86,6.12)   | 4.5 (3.16,5.02)    | 5.29 (4.36,6.24)  | 5.27 (4.47,6.2)  |
| Moderate group                              | 4.42 (3.55,5.68)   | 4.4 (3.31,5.8)     | 5.41 (4.38,6.96)  | 5.41 (4.42,6.79) |
| <b>NC (× 10<sup>9</sup>/L)</b>              |                    |                    |                   |                  |
| All patients                                | 2.66 (2.09,3.58)   | 2.64 (1.96,3.58)   | 3.26 (2.23,4.36)  | 3.18 (2.37,4.18) |
| Mild group                                  | 2.79 (2.22,3.72)   | 2.47 (1.86,3.21)   | 2.98 (2.2,3.94)   | 3.09 (2.19,3.77) |
| Moderate group                              | 2.58 (1.95,3.54)   | 2.77 (2.05,4.34)   | 3.37 (2.3,5.11)   | 3.25 (2.38,4.5)  |
| <b>LYM, median (IQR), ×10<sup>9</sup>/L</b> |                    |                    |                   |                  |
| All patients                                | 1.2 (0.84,1.64)    | 1.04 (0.74,1.35)   | 1.37 (0.93,1.81)  | 1.47 (1.16,1.86) |
| Mild group                                  | 1.41 (1.03,1.85)   | 1.14 (0.89,1.59)   | 1.61 (1.16,1.99)  | 1.67 (1.19,2)    |
| Moderate group                              | 1.14 (0.8,1.55)    | 0.93 (0.68,1.31)   | 1.25 (0.87,1.62)  | 1.42 (1.13,1.71) |
| <b>PLT, median (IQR), ×10<sup>9</sup>/L</b> |                    |                    |                   |                  |
| All patients                                | 174 (134,236)      | 186 (139.5,233.5)  | 246 (193,317)     | 246 (196,289.75) |
| Mild group                                  | 181 (151,243)      | 197.5 (148,228.75) | 246 (197,311)     | 249 (191,295)    |
| Moderate group                              | 160 (129,224.25)   | 184 (137.5,240.5)  | 244 (191.25,321)  | 246 (197,287.5)  |
| <b>Infection-related indices</b>            |                    |                    |                   |                  |
| <b>CRP (mg/L)</b>                           |                    |                    |                   |                  |
| All patients                                | 8.15 (1.3,23.07)   | 16.72 (7.73,27.24) | 2.29 (0.61,8.71)  | 1.4 (0.59,3.32)  |
| Mild group                                  | 2.69 (0.5,12.97)   | 8.3 (2.3,15.3)     | 0.86 (0.5,3.67)   | 0.85 (0.4,2.8)   |
| Moderate group                              | 13.56 (3.16,35.24) | 21.6 (8.66,31.13)  | 4.61 (1.42,15.55) | 1.59 (0.7,3.94)  |

**PCT, median (IQR), ng/mL**

|                |                  |                  |                  |                  |
|----------------|------------------|------------------|------------------|------------------|
| All patients   | 0.08 (0.04,0.11) | 0.07 (0.05,0.11) | 0.06 (0.03,0.1)  | 0.05 (0.03,0.07) |
| Mild group     | 0.05 (0.03,0.09) | 0.05 (0.04,0.07) | 0.06 (0.03,0.08) | 0.05 (0.03,0.07) |
| Moderate group | 0.08 (0.05,0.12) | 0.08 (0.06,0.15) | 0.07 (0.03,0.1)  | 0.06 (0.03,0.08) |

**ESR, median (IQR), mm/h**

|                |                 |                  |                 |                   |
|----------------|-----------------|------------------|-----------------|-------------------|
| All patients   | 35.5 (13,66.25) | 60 (34.75,102.5) | 35 (14,81)      | 36.5 (22.25,76.5) |
| Mild group     | 25 (9,62)       | 39 (30,67)       | 27 (12,71.5)    | 50 (25,92)        |
| Moderate group | 51 (26,72)      | 82 (47,125)      | 51 (20.75,84.5) | 35 (20.25,63.75)  |

---

Abbreviations: IQR, interquartile range; WBC, white blood cell; NC, neutrophil count; LYM, lymphocyte counts; PLT, platelet counts; CRP, C-reactive protein; PCT, procalcitonin; ESR, erythrocyte sedimentation rat
